# Supplementary material for: Implementation of the EIRA 3 Intervention by Targeting Primary Health Care Practitioners: Effectiveness in Increasing Physical Activity
Source: MDPI journal article supplement (doi:10.3390/ijerph181910537), 2021-10-08
Supplement: s1 [file s1]

**Table S1.** Description of the intervention for each of the unhealthy behaviours and the stage of change of participants.

| Unhealthy behaviours |                               |       |                    |                               |                            |                    |                                  |                            |                    |  |  |  |  |
|----------------------|-------------------------------|-------|--------------------|-------------------------------|----------------------------|--------------------|----------------------------------|----------------------------|--------------------|--|--|--|--|
|                      | Tobacco use                   |       |                    | Physical inactivity           |                            |                    | Non-adherence mediterranean diet |                            |                    |  |  |  |  |
| Stage of change      | Individual                    | Group | Community          | Individual                    | Group                      | Community          | Individual                       | Group                      | Community          |  |  |  |  |
| Precontemplation     | Very brief intervention + SMS |       | Social prescribing | Very brief intervention + SMS | Health education workshops | Social prescribing | Very brief intervention + SMS    | Health education workshops | Social prescribing |  |  |  |  |
| Contemplation        |                               |       |                    | Brief intervention App+ SMS   |                            |                    | Brief intervention App+ SMS      |                            |                    |  |  |  |  |
| Preparation          |                               |       |                    | Very brief intervention + SMS |                            |                    | Very brief intervention + SMS    |                            |                    |  |  |  |  |
| Action               |                               |       |                    |                               |                            |                    |                                  |                            |                    |  |  |  |  |
| Maintenance          |                               |       |                    |                               |                            |                    |                                  |                            |                    |  |  |  |  |
| Termination          |                               |       |                    |                               |                            |                    |                                  |                            |                    |  |  |  |  |

**Table S2.** Community physical activity resources in participants PHCs by regions.

| Region           | Resources (N) | Physical activity                                                                            | Intensity           |
|------------------|---------------|----------------------------------------------------------------------------------------------|---------------------|
| Andalusia        | 6             | gymnastics, pilates, dance, zumba, aerobics                                                  | moderate, high      |
| Aragon           | 8             | walking, cycling, swimming                                                                   | low, moderate, high |
| Balearic Island  | 20            | gymnastics, pilates, yoga, fitness, swimming, aquagym, Tai-chi, dancing, 'solidarity garden' | low, moderate       |
| Basque Country   | 11            | walking, gymnastics, swimming, aquagym, dance, 'healthy aging'.                              | moderate, high      |
| Castile and Leon | 1             | walking                                                                                      | low, moderate       |
| Catalonia        | 11            | aerobics, fitness, walking, dancing                                                          | low, moderate, high |
| Galicia          | 21            | gymnastics, pilates, yoga, swimming, aquagym, Tai-chi, dancing, zumba, cycling               | low, moderate, high |
